# Supplementary figures and images for: Identification of a Novel Polyomavirus from Patients with Acute Respiratory Tract Infections
Source: PLOS journal article supplement (doi:10.1371/journal.ppat.0030064), 2007-05-01

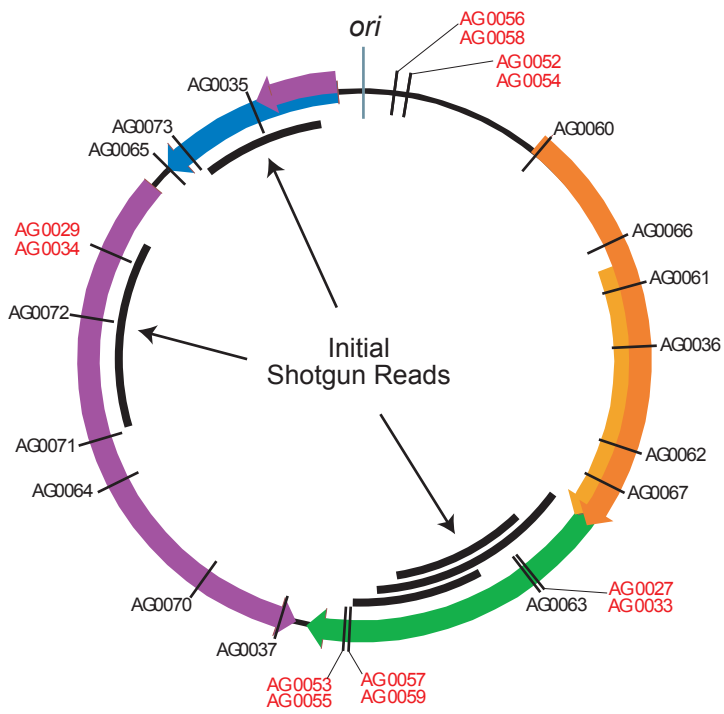

Supplement: S5 (10.1371/journal.ppat.0030064.s005) [file journal.ppat.0030064.s005]
